# Supplementary material for: Different Contribution of Splanchnic Organs to Hyperlactatemia in Fecal Peritonitis and Cardiac Tamponade
Source: PubMed Central journal article supplement (PMC3817825; doi:10.1155/2013/251084), 2013-10-20
Supplement: 251084.f1.pdf [file 251084.f1.pdf]

# Electronic Supplement

## DIFFERENT CONTRIBUTION OF SPLANCHNIC ORGANS TO HYPERLACTATEMIA IN FECAL PERITONITIS AND CARDIAC TAMPONADE

José Gorrasi<sup>1</sup>, Anestis Eleftheriadis<sup>1</sup>, Jukka Takala<sup>1</sup>, Sebastian Brandt<sup>1</sup>, Siamak Djafarzadeh<sup>1</sup>,  
Lukas Bruegger<sup>2</sup>, Hendrik Bracht<sup>1</sup>, Stephan M. Jakob<sup>1</sup>

ES-Figure 1. Mesenteric lactate exchange.

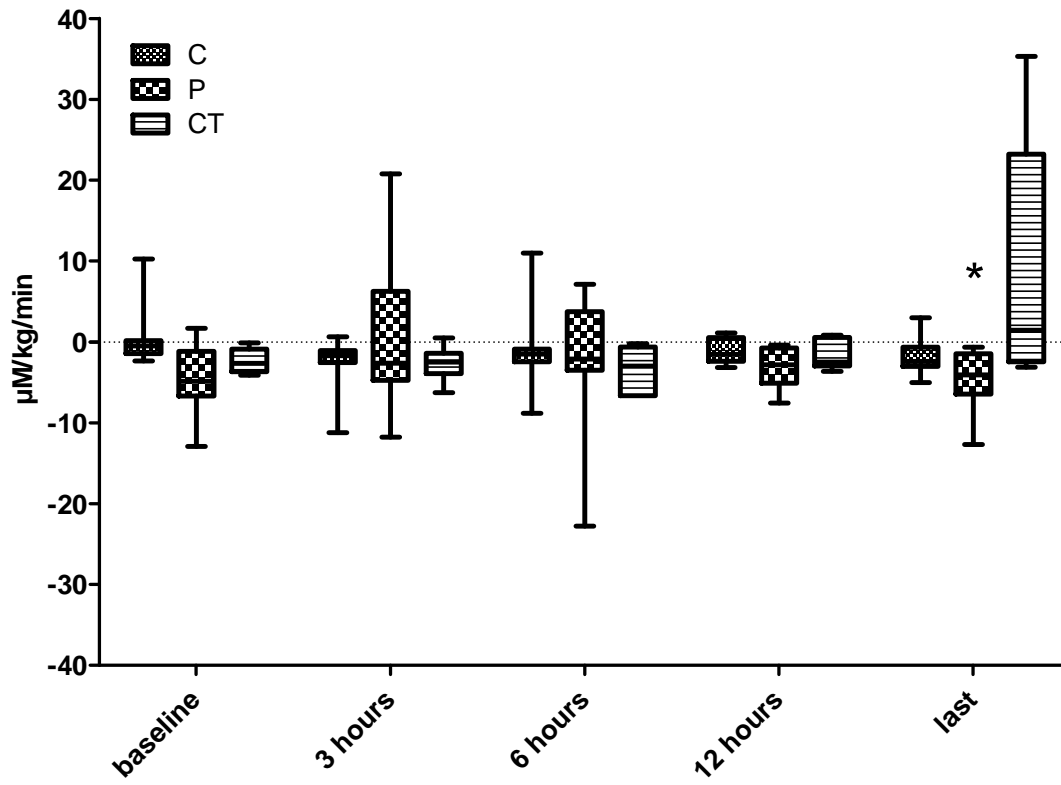

\*Friedman Test.

ES-Figure 2. Renal lactate exchange

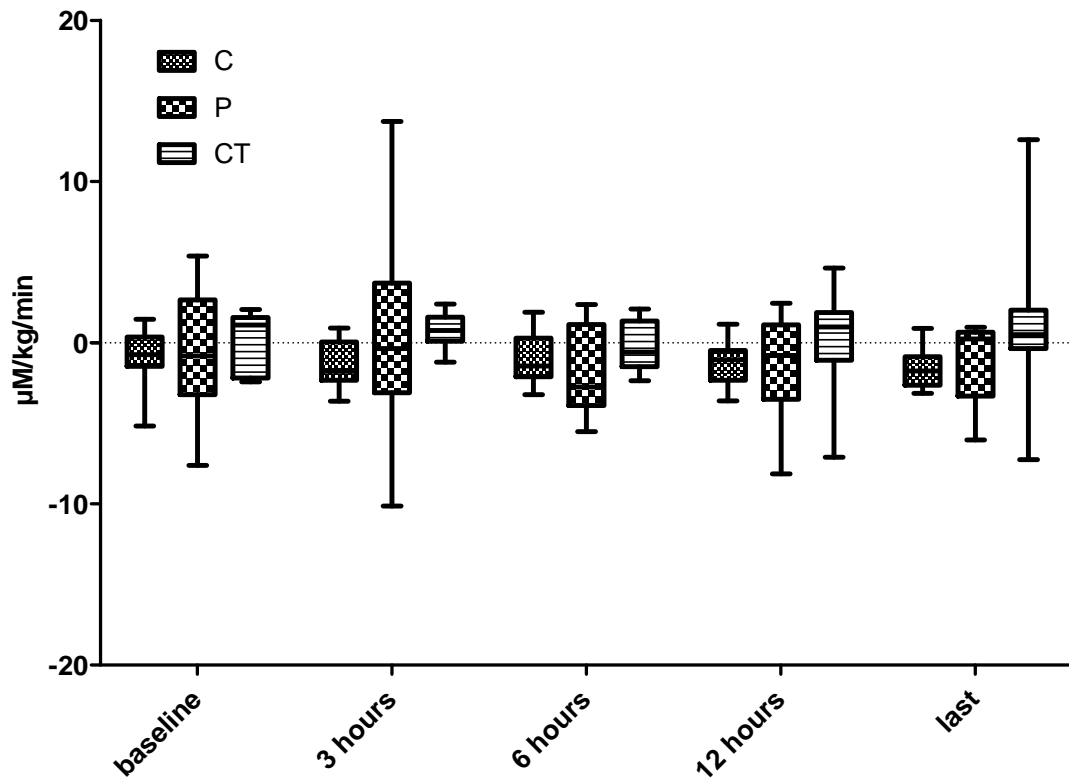

ES-Figure 3. Hepatic lactate efflux

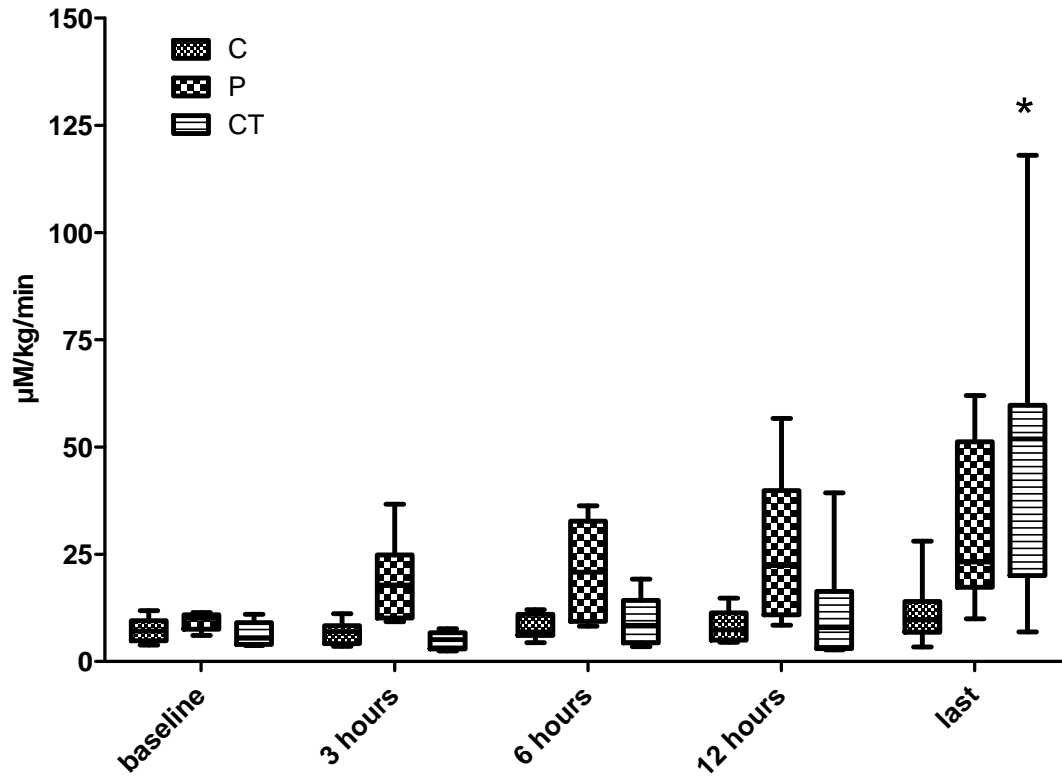

\*Friedmann Test.

ES-Figure 4. Whole body vein lactate efflux (lung lactate influx)

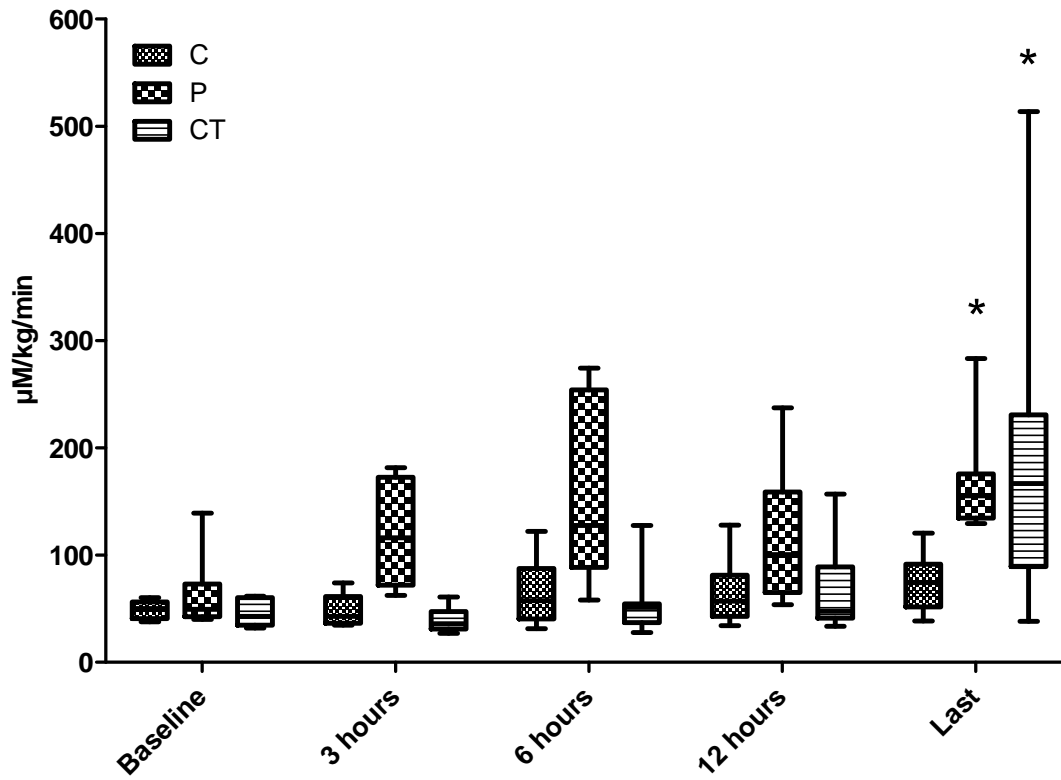

\*Friedmann Test

ES-Table 1. Regional oxygen transport.

|                               |             | N | Baseline              | 3 hours               | 6 hours               | 12 hours              | Last measurement      | p*    |
|-------------------------------|-------------|---|-----------------------|-----------------------|-----------------------|-----------------------|-----------------------|-------|
| Hepatic oxygen consumption    | Controls    | 8 | 0.86<br>(0.68 – 1.18) | 0.96<br>(0.78 – 1.66) | 1.04<br>(0.69 – 1.38) | 0.84<br>(0.65 – 1.40) | 0.89<br>(0.37 – 1.34) | 0.116 |
|                               | Peritonitis | 7 | 0.94<br>(0.43 – 1.23) | 0.91<br>(0.23 – 1.22) | 1.09<br>(0.32 – 1.35) | 1.10<br>(0.38 – 1.50) | 1.25<br>(0.38 – 1.97) | 0.746 |
|                               | Tamponade   | 7 | 0.82<br>(0.52 – 1.16) | 0.79<br>(0.61 – 1.26) | 0.74<br>(0.42 – 1.18) | 0.65<br>(0.24 – 1.18) | 0.47<br>(0.06 – 1.11) | 0.284 |
| Mesenteric oxygen consumption | Controls    | 8 | 0.57<br>(0.40 – 0.68) | 0.63<br>(0.39 – 0.76) | 0.63<br>(0.37 – 0.85) | 0.62<br>(0.37 – 1.03) | 0.58<br>(0.33 – 1.02) | 0.681 |
|                               | Peritonitis | 7 | 0.65<br>(0.46 – 0.76) | 0.72<br>(0.42 – 1.04) | 0.58<br>(0.53 – 1.13) | 0.71<br>(0.38 – 0.88) | 0.55<br>(0.17 – 0.93) | 0.096 |
|                               | Tamponade   | 7 | 0.61<br>(0.29 – 3.31) | 0.68<br>(0.50 – 1.77) | 0.68<br>(0.45 – 1.75) | 0.69<br>(0.63 – 1.49) | 0.76<br>(0.56 – 1.35) | 0.849 |
| Renal oxygen consumption      | Controls    | 6 | 0.17<br>(0.09 – 0.30) | 0.17<br>(0.08 – 0.28) | 0.23<br>(0.13 – 0.32) | 0.24<br>(0.12 – 0.45) | 0.13<br>(0.10 – 0.34) | 0.323 |
|                               | Peritonitis | 7 | 0.17<br>(0.14 – 0.38) | 0.21<br>(0.16 – 0.28) | 0.17<br>(0.13 – 0.21) | 0.19<br>(0.15 – 0.23) | 0.18<br>(0.09 – 0.52) | 0.438 |
|                               | Tamponade   | 7 | 0.16<br>(0.07 – 0.34) | 0.14<br>(0.11 – 0.26) | 0.16<br>(0.12 – 0.30) | 0.16<br>(0.12 – 0.34) | 0.09<br>(0.04 – 0.26) | 0.041 |
| Spleen oxygen consumption     | Controls    | 8 | 0.02<br>(0.02 – 0.04) | 0.03<br>(0.01 – 0.04) | 0.03<br>(0.01 – 0.04) | 0.02<br>(0.02 – 0.04) | 0.02<br>(0.01 – 0.03) | 0.925 |
|                               | Peritonitis | 6 | 0.03<br>(0.02 – 0.05) | 0.03<br>(0.02 – 0.06) | 0.03<br>(0.01 – 0.04) | 0.03<br>(0.01 – 0.05) | 0.03<br>(0.01 – 0.05) | 0.687 |
|                               | Tamponade   | 7 | 0.02<br>(0.02 – 0.03) | 0.02<br>(0.02 – 0.03) | 0.03<br>(0.02 – 0.05) | 0.03<br>(0.01 – 0.07) | 0.02<br>(0.02 – 0.05) | 0.150 |
| Hepatic oxygen extraction     | Controls    | 8 | 0.41<br>(0.24 - 0.62) | 0.57<br>(0.24 - 0.70) | 0.49<br>(0.25 - 0.66) | 0.38<br>(0.28 - 0.70) | 0.42<br>(0.26 - 0.58) | 0.681 |
|                               | Peritonitis | 7 | 0.36<br>(0.24 - 0.62) | 0.29<br>(0.13 - 0.48) | 0.36<br>(0.19 - 0.62) | 0.32<br>(0.26 - 0.56) | 0.56<br>(0.34 - 0.98) | 0.022 |
|                               | Tamponade   | 7 | 0.44<br>(0.31 - 0.52) | 0.53<br>(0.39 - 0.80) | 0.49<br>(0.24 - 0.77) | 0.76<br>(0.19 - 0.79) | 0.75<br>(0.33 - 0.88) | 0.195 |
| Mesenteric oxygen extraction  | Controls    | 8 | 0.29<br>(0.17 - 0.35) | 0.30<br>(0.17 - 0.46) | 0.29<br>(0.16 - 0.46) | 0.31<br>(0.13 - 0.40) | 0.25<br>(0.16 - 0.50) | 0.809 |
|                               | Peritonitis | 7 | 0.35                  | 0.30                  | 0.27                  | 0.28                  | 0.32                  | 0.938 |

|                           |             |   |                       |                       |                       |                       |                       |       |
|---------------------------|-------------|---|-----------------------|-----------------------|-----------------------|-----------------------|-----------------------|-------|
|                           |             |   | (0.24 - 0.41)         | (0.24 - 0.50)         | (0.18 - 0.47)         | (0.22 - 0.46)         | (0.22 - 0.59)         |       |
|                           | Tamponade   | 7 | 0.32<br>(0.11 - 0.43) | 0.37<br>(0.29 - 0.46) | 0.40<br>(0.19 - 0.54) | 0.41<br>(0.35 - 0.59) | 0.61<br>(0.50 - 0.88) | 0.002 |
| Renal oxygen extraction   | Controls    | 6 | 0.27<br>(0.18 - 0.42) | 0.24<br>(0.19 - 0.46) | 0.26<br>(0.23 - 0.52) | 0.34<br>(0.24 - 0.50) | 0.37<br>(0.17 - 0.45) | 0.504 |
|                           | Peritonitis | 7 | 0.27<br>(0.18 - 0.50) | 0.30<br>(0.21 - 0.38) | 0.29<br>(0.24 - 0.43) | 0.29<br>(0.24 - 0.42) | 0.33<br>(0.28 - 0.58) | 0.133 |
|                           | Tamponade   | 7 | 0.26<br>(0.14 - 0.40) | 0.33<br>(0.28 - 0.44) | 0.36<br>(0.29 - 0.44) | 0.42<br>(0.34 - 0.49) | 0.53<br>(0.39 - 0.92) | 0.001 |
| Spleen oxygen extraction  | Controls    | 8 | 0.20<br>(0.12 - 0.28) | 0.17<br>(0.05 - 0.39) | 0.18<br>(0.05 - 0.26) | 0.14<br>(0.06 - 0.26) | 0.13 (0.04 - 0.30)    | 0.681 |
|                           | Peritonitis | 6 | 0.26<br>(0.11 - 0.43) | 0.29<br>(0.12 - 0.56) | 0.32<br>(0.10 - 0.43) | 0.35<br>(0.09 - 0.43) | 0.31 (0.13 - 0.60)    | 0.785 |
|                           | Tamponade   | 7 | 0.21<br>(0.16 - 0.30) | 0.27<br>(0.18 - 0.43) | 0.32<br>(0.08 - 0.43) | 0.43<br>(0.24 - 0.68) | 0.70 (0.43 - 0.94)    | 0.001 |
| Femoral oxygen extraction | Controls    | 8 | 0.51<br>(0.41 - 0.66) | 0.46<br>(0.28 - 0.79) | 0.40<br>(0.28 - 0.81) | 0.45<br>(0.38 - 0.72) | 0.52 (0.38 - 0.67)    | 0.483 |
|                           | Peritonitis | 7 | 0.54<br>(0.39 - 0.66) | 0.36<br>(0.20 - 0.62) | 0.40<br>(0.13 - 0.68) | 0.58<br>(0.42 - 0.64) | 0.56 (0.43 - 0.70 )   | 0.323 |
|                           | Tamponade   | 7 | 0.55<br>(0.41 - 0.75) | 0.67<br>(0.52 - 0.74) | 0.63<br>(0.45 - 0.76) | 0.72<br>(0.56 - 0.76) | 0.84 (0.76 - 0.94)    | 0.010 |

All oxygen consumption rates are in ml/kg/min. \*Friedman Test.

ES-Table 2. Regional pCO<sub>2</sub> gradients.

|                                                      |             | N | Baseline              | 3 hours               | 6 hours              | 12 hours              | Last measurement      | p*     |
|------------------------------------------------------|-------------|---|-----------------------|-----------------------|----------------------|-----------------------|-----------------------|--------|
| Mixed venous-arterial PCO <sub>2</sub> gradient      | Controls    | 8 | 8.0<br>(6.5 – 9.2)    | 6.8<br>(5.3– 10.5)    | 8.0<br>(1.7 – 12.1)  | 8.1<br>(5.3 – 10.6)   | 8.4<br>(4.6 – 12.9)   | 0.910  |
|                                                      | Peritonitis | 7 | 7.7<br>(0.9 – 10.3)   | 9.7<br>(6.1 – 12.5)   | 10.0<br>(7.0 – 23.5) | 10.9<br>(7.2 – 11.9)  | 10.9<br>(8.5 – 17.4)  | 0.017  |
|                                                      | Tamponade   | 7 | 8.7<br>(7.1 – 10.4)   | 9.7<br>(6.5 – 14.0)   | 10.3<br>(8.4 – 13.7) | 14.2<br>(10.4 – 16.7) | 20.9<br>(15.2 – 64.4) | <0.001 |
| Hepatic venous-arterial PCO <sub>2</sub> gradient    | Controls    | 8 | 7.7<br>(6.1 – 10.8)   | 7.5<br>(4.1 – 12.4)   | 7.6<br>(4.6 – 13.4)  | 7.8<br>(3.2 – 12.0)   | 8.5<br>(5.0 – 16.9)   | 0.897  |
|                                                      | Peritonitis | 6 | 8.5<br>(-1.50 – 14.5) | 10.7<br>(4.3 – 14.8)  | 9.9<br>(7.2 – 23.7)  | 10.7<br>(7.6– 16.4)   | 12.3<br>(6.7 – 22.2)  | 0.004  |
|                                                      | Tamponade   | 7 | 7.7<br>(0.2 – 11.1)   | 10.1<br>(4.00 – 15.9) | 10.6<br>(7.5 – 13.5) | 14.9<br>(10.4– 20.2)  | 22.8<br>(14.0 – 72.0) | <0.001 |
| Portal venous-arterial PCO <sub>2</sub> gradient     | Controls    | 8 | 7.4<br>(5.6 – 9.2)    | 8.3<br>(4.2 – 10.2)   | 7.3<br>(1.4– 12.0)   | 7.6<br>(4.0 – 9.70)   | 8.9<br>(2.6 – 10.3)   | 0.775  |
|                                                      | Peritonitis | 7 | 8.5<br>(5.0 – 13.2)   | 10.4<br>(4.3 – 13.2)  | 10.5<br>(6.3 – 12.8) | 9.6<br>(5.8 – 15.3)   | 11.1<br>(6.1 – 19.3)  | 0.909  |
|                                                      | Tamponade   | 6 | 7.6<br>(4.7 – 9.0)    | 9.1<br>(7.9– 11.3)    | 8.4<br>(7.1 – 12.3)  | 13.2<br>(10.6 – 16.7) | 17.9<br>(13.6 – 74.4) | <0.001 |
| Mesenteric venous-arterial PCO <sub>2</sub> gradient | Controls    | 8 | 7.0<br>(4.7 – 10.2)   | 9.0<br>(4.0 – 13.6)   | 7.9<br>(3.8 – 12.4)  | 8.2<br>(4.7 – 11.4)   | 7.1<br>(4.2– 13.4)    | 0.784  |
|                                                      | Peritonitis | 7 | 9.2<br>(6.8 – 15.3)   | 9.5<br>(8.0 – 13.1)   | 12.5<br>(6.2 – 22.8) | 10.2<br>(8.2 – 19.9)  | 11.0<br>(7.5 – 20.9)  | 0.932  |
|                                                      | Tamponade   | 6 | 9.2<br>(7.8 – 14.1)   | 11.5<br>(9.0 – 13.3)  | 10.2<br>(5.9 – 17.5) | 15.4<br>(10.3 – 19.5) | 20.1<br>(16.8 – 46.0) | 0.002  |
| Renal venous-arterial PCO <sub>2</sub> gradient      | Controls    | 7 | 5.4<br>(2.2– 9.4)     | 4.8<br>(2.3– 7.1)     | 4.1<br>(-0.5– 11.5)  | 5.8<br>(2.8– 11.7)    | 5.3<br>(2.2– 9.8)     | 0.256  |
|                                                      | Peritonitis | 7 | 4.2<br>(2.3 – 11.1)   | 6.4<br>(3.4 – 10.7)   | 6.6<br>(3.7 – 17.9)  | 6.0<br>(4.5 – 10.6)   | 5.2<br>(3.4 – 14.9)   | 0.300  |
|                                                      | Tamponade   | 7 | 4.0<br>(1.8 – 8.0)    | 3.8<br>(1.0 – 10.6)   | 5.0<br>(3.5 – 9.8)   | 7.0<br>(5.0 – 11.6)   | 8.2<br>(4.3 – 71.2)   | 0.001  |
| Femoral venous-arterial PCO <sub>2</sub> gradient    | Controls    | 8 | 10.8<br>(8.6 – 12.8)  | 9.6<br>(7.6 – 13.8)   | 10.4<br>(3.2 – 15.6) | 11.1<br>(4.8 – 16.9)  | 10.9<br>(6.5 – 25.5)  | 0.827  |
|                                                      | Peritonitis | 6 | 11.8                  | 10.7                  | 15.5                 | 15.2                  | 15.6                  | 0.121  |



|                                                           |             |   |                       |                       |                       |                        |                        |       |
|-----------------------------------------------------------|-------------|---|-----------------------|-----------------------|-----------------------|------------------------|------------------------|-------|
|                                                           |             |   | (6.3 – 13.4)          | (-0.4 – 18.7)         | (4.0 – 24.5)          | (9.8 – 16.4)           | (10.6 – 23.7)          |       |
|                                                           | Tamponade   | 5 | 11.8<br>(8.9 – 16.1)  | 13.7<br>(11.8 – 17.5) | 13.7<br>(11.6 – 19.2) | 17.9<br>(15.6 – 20.1)  | 25.0<br>(19.2 – 69.50) | 0.002 |
| Spleen venous-<br>arterial PCO <sub>2</sub><br>gradient   | Controls    | 8 | 4.5<br>(3.7 – 7.9)    | 4.6<br>(1.6 – 9.4)    | 5.0<br>(-2.0 – 8.7)   | 4.2<br>(1.6 – 7.2)     | 4.7<br>(1.2 – 11.2)    | 0.914 |
|                                                           | Peritonitis | 5 | 6.5<br>(3.0 - 8.3)    | 11.6<br>(3.9 - 15.0)  | 13.6<br>(4.3 – 22.4)  | 11.6<br>(3.9 - 18.5)   | 6.5<br>(3.0 - 24.3)    | 0.316 |
|                                                           | Tamponade   | 6 | 5.0<br>(3.4 - 8.6)    | 7.2<br>(4.4 - 9.6)    | 8.2<br>(3.0 - 11.7)   | 12.0<br>(7.1 - 18.6)   | 16.1<br>(7.3 – 89.9)   | 0.010 |
| Jejunal mucosal-<br>arterial PCO <sub>2</sub><br>gradient | Controls    | 7 | 19.5<br>(-1.8 - 27.2) | 14.8<br>(8.8 - 23.7)  | 21.5<br>(8.0 - 22.9)  | 21.1<br>(7.4 - 70.6)   | 30.2<br>(20.3 - 49.6)  | 0.017 |
|                                                           | Peritonitis | 7 | 26.6<br>(15.4 - 72.1) | 31.5<br>(14.1 - 69.5) | 33.8<br>(12.7 - 56.3) | 50.4<br>(24.4 - 112.5) | 67.4<br>(12.5 - 112.5) | 0.005 |
|                                                           | Tamponade   | 7 | 25.2<br>(15.4 - 72.1) | 34.0<br>(14.1 - 69.5) | 35.6<br>(12.7 - 56.3) | 71.6<br>(24.4 - 112.5) | 75.0<br>(12.5 - 112.5) | 0.014 |

All pCO<sub>2</sub> gradients are in mmHg. \*Friedman Test.
